# Supplementary material
Source: PubMed Central journal article supplement (PMC4871241)
Supplement: NIHMS785404-supplement-supplement_1.pdf [file NIHMS785404-supplement-supplement_1.pdf]

## Supplementary material

Table 1b Characteristics of screens among women aged 50-69 years, stratified by annual (9-17 months) and biennial (18-30 months) screening interval in the Breast Cancer Surveillance Consortium (BCSC) 1996-2010, United States (US) and Copenhagen 1991-2012 and Funen 1993-2013, Denmark

|                                          | Screening interval       |                            |                          |                            |                          |                            |
|------------------------------------------|--------------------------|----------------------------|--------------------------|----------------------------|--------------------------|----------------------------|
|                                          | BCSC, US                 |                            | Copenhagen, Denmark      |                            | Funen, Denmark           |                            |
|                                          | Annual<br>(% of stratum) | Biennial<br>(% of stratum) | Annual<br>(% of stratum) | Biennial<br>(% of stratum) | Annual<br>(% of stratum) | Biennial<br>(% of stratum) |
| Total number of women                    | 10,976                   | 7,228                      | 1,823                    | 47,387                     | 1,200                    | 74,581                     |
| Total number of screens                  | 23,013                   | 9,810                      | 1,923                    | 120,310                    | 1,207                    | 282,465                    |
| Film mammograms                          | 19,444(84.5)             | 8523 (86.9)                | 550 (28.6)               | 98,960 (82.3)              | 824 (68.3)               | 190,849 (67.6)             |
| Digital mammograms                       | 2,772(12.0)              | 1,081 (11.0)               | 1,373 (71.4)             | 21,350 (17.8)              | 383 (31.7)               | 91,616 (32.4)              |
| Missing type                             | 797 (3.5)                | 206 (2.1)                  | 0 (0.0)                  | 0 (0.0)                    | 0 (0.0)                  | 0.0 (0.0)                  |
| Age at the screen                        |                          |                            |                          |                            |                          |                            |
| 50-54 years                              | 5,147 (22.4)             | 2,847 (29.0)               | 1,145 (59.5)             | 23,877(19.9)               | 820 (67.9)               | 59,213 (21.0)              |
| 55-59 years                              | 6,840 (29.7)             | 3,200 (32.6)               | 382 (19.9)               | 43,793 (36.4)              | 115 (9.5)                | 88,651 (31.4)              |
| 60-64 years                              | 5,613 (24.4)             | 1,982 (20.2)               | 249 (13.0)               | 28,034 (23.3)              | 119 (9.9)                | 74,783 (26.5)              |
| 65-69 years                              | 5,413 (23.5)             | 1,781 (18.2)               | 147 (7.6)                | 24,606 (20.5)              | 153 (12.7)               | 59,818 (21.2)              |
| Number of screens per woman <sup>a</sup> |                          |                            |                          |                            |                          |                            |
| 1                                        | 6,016 (54.8)             | 5,593 (77.4)               | 1,729 (94.9)             | 14,572(30.8)               | 1,200 (99.5)             | 15,055 (20.2)              |
| 2                                        | 2,218 (20.2)             | 1,098 (15.2)               | 88 (4.8)                 | 13,396(28.3)               | 7 (0.5)                  | 12,204 (16.4)              |
| 3                                        | 1,079 (9.8)              | 288 (4.0)                  | 6 (0.3)                  | 7,655 (16.2)               |                          | 10,186 (13.7)              |
| 4                                        | 606 (5.5)                | 135 (1.9)                  |                          | 4,865 (10.3)               |                          | 8,974 (12.0)               |
| 5                                        | 375 (3.4)                | 74 (1.0)                   |                          | 5,339 (11.3)               |                          | 8,665 (11.6)               |
| 6                                        | 262 (2.4)                | 33 (0.5)                   |                          | 1,094(2.3)                 |                          | 8,437 (11.3)               |
| 7                                        | 175 (1.6)                | 7 (0.1)                    |                          | 466 (1.0)                  |                          | 6,449 (8.6)                |
| 8                                        | 105 (1.0)                |                            |                          |                            |                          | 4,041 (5.4)                |
| 9                                        | 60 (0.5)                 |                            |                          |                            |                          | 5,70 (0.8)                 |
| 10                                       | 41 (0.4)                 |                            |                          |                            |                          |                            |
| >10                                      | 39 (0.4)                 |                            |                          |                            |                          |                            |

The following censoring mechanisms are used: 1) if information about time since last mammogram from database differs from self-report information; 2) if time since last mammogram >36 months; 3) if the mammogram had a missing BI-RADS assessment or result; 4) If the screen has another screening interval compared to the second screen then the screen and all subsequent screens are censored.

<sup>a</sup> The number of annual or biennial screens after the first screen (first screens are excluded).
